# Supplementary material for: Single-cell transcriptome maps of myeloid blood cell lineages in Drosophila
Source: PubMed Central journal article supplement (PMC7479620; doi:10.1038/s41467-020-18135-y), 2020-09-08
Supplement: 41467_2020_18135_MOESM3_ESM.pdf [file 41467_2020_18135_MOESM3_ESM.pdf]

**Title:** Supplementary Movie 1

**Description:** Three-dimensional trajectory landscape

**Title:** Supplementary Data 1

**Description:** Signature genes for hemocytes and non-hematopoietic cell types using Wilcoxon Rank-Sum test

**Title:** Supplementary Data 2

**Description:** Signature genes for subclusters using Wilcoxon Rank-Sum test

**Title:** Supplementary Data 3

**Description:** Putative Drosophila markers screened in this study

**Title:** Supplementary Data 4

**Description:** Putative markers for embryonic lymph gland hemocytes

**Title:** Supplementary Data 5

**Description:** Putative markers for each subcluster

**Title:** Supplementary Data 6

**Description:** Gene modules of the lymph gland trajectory analysis in Supplementary Fig. 3f

**Title:** Supplementary Data 7

**Description:** Gene modules of the lamellocyte subtrajectory analysis in Fig. 7d

**Title:** Supplementary Data 8

**Description:** Lineage-specific signature genes for subclusters
